# Supplementary material
Source: PubMed Central journal article supplement (PMC2867376)
Supplement: 00606.2009_1.pdf [file 00606.2009_1.pdf]

**Table 1. Characterization of Hippocampus and HPA-axis.**

|                                                       | Cx<br>(N=5-13)    | LBW<br>(N=8-14)     | SSRI-LBW<br>(N=8-16) | <i>Post hoc test</i><br><i>P-values</i>               |                             |
|-------------------------------------------------------|-------------------|---------------------|----------------------|-------------------------------------------------------|-----------------------------|
| <b><i>Adrenal Corticosterone Release</i></b>          |                   |                     |                      |                                                       |                             |
| <b>RST AUC 60 to 90 minutes</b><br>(ng/*minutes)      | <b>12470±1270</b> | <b>19440±1240*</b>  | <b>11180±1030</b>    | <b>*P&lt;0.01 vs. Cx &amp; vs. SSRI-LBW</b>           |                             |
| <b>24 H U-Corticosterone</b><br>(nmol/[24 H*kg b.w.]) | <b>10.1±0.6</b>   | <b>13.9±1.2†</b>    | <b>8.1±0.5</b>       | <b>†P&lt;0.05 vs. Cx &amp; P&lt;0.01 vs. SSRI-LBW</b> |                             |
| <b><i>Pituitary ACTH Release</i></b>                  |                   |                     |                      |                                                       |                             |
| <b>Plasma ACTH concentrations</b><br>(pg/ml)          | <b>9 a.m.</b>     | <b>15.96±0.65</b>   | <b>18.13±1.40</b>    | <b>16.87±1.01</b>                                     | ---                         |
|                                                       | <b>9 p.m.</b>     | <b>13.18±0.37‡</b>  | <b>15.53±1.42</b>    | <b>12.89±0.37‡</b>                                    | <b>‡P&lt;0.05 vs. 9a.m.</b> |
| <b><i>Hypothalamic Corticosteroid Feedback</i></b>    |                   |                     |                      |                                                       |                             |
| <b>HSD1 mRNA Expression</b><br>(% of Cx)              | <b>100.0±20.4</b> | <b>82.5±16.1</b>    | <b>73.6±13.7</b>     | ---                                                   |                             |
| <b>MR mRNA Expression</b><br>(% of Cx)                | <b>100.0±21.4</b> | <b>501.7±160.4§</b> | <b>205.8±60.0</b>    | <b>§P&lt;0.05 vs. Cx</b>                              |                             |
| <b>GR mRNA Expression</b><br>(% of Cx)                | <b>100.0±15.8</b> | <b>123.9±15.8</b>   | <b>121.6±46.5</b>    | ---                                                   |                             |
| <b><i>Hippocampal Corticosteroid Feedback</i></b>     |                   |                     |                      |                                                       |                             |
| <b>HSD1 mRNA Expression</b><br>(% of Cx)              | <b>100.0±15.5</b> | <b>122.2±25.3</b>   | <b>67.5±8.6</b>      | ---                                                   |                             |
| <b>MR mRNA Expression</b><br>(% of Cx)                | <b>100.0±10.0</b> | <b>123.2±13.3#</b>  | <b>85.5±8.9</b>      | <b># P=0.0725 vs. Cx</b>                              |                             |
| <b>GR mRNA Expression</b><br>(% of Cx)                | <b>100.0±14.1</b> | <b>122.5±11.1</b>   | <b>88.1±10.9</b>     | ---                                                   |                             |

Data are means±sem. P-values for comparisons reflect the results for the *post hoc* analysis which has been carried out only when the one way of analysis of variance test (ANOVA) results in a p-value less than 0.05.

RST: Restrain Stress Test (Figure 1). 24 H U-Corticosterone: 24 hour urinary corticosterone excretion.

**Table 2. Oral Glucose Tolerance Test (OGTT).**

|                                                           | Cx<br>(N=13) | LBW<br>(N=11) | SSRI-LBW<br>(N=13) | Post hoc test<br>P-values               |
|-----------------------------------------------------------|--------------|---------------|--------------------|-----------------------------------------|
| <i>Oral Glucose Tolerance Test</i>                        |              |               |                    |                                         |
| Fasting Glucose Concentrations<br>(mmol/l)                | 4.55±0.13    | 4.37±0.11     | 4.72±0.13          | ---                                     |
| Fasting Insulin Concentrations<br>(mU/l)                  | 7.83±1.12    | 26.93±5.24*   | 11.83±2.17         | *P<0.01 vs. Cx &<br>P<0.05 vs. SSRI-LBW |
| OGTT Total AUC <sub>glucose</sub><br>(mmol/l glucose*min) | 871±20       | 898±23        | 767±29†            | †P<0.05 vs. Cx &<br>P<0.01 vs. LBW      |
| OGTT Total AUC <sub>insulin</sub><br>(mU/l insulin*min)   | 1,542±39     | 3,738±79‡     | 1,996±37           | ‡P<0.01 vs. Cx &<br>SSRI-LBW            |
| Insulin-Sensitivity Index (ISI)<br>(expressed as % of Cx) | 100.0±10.3   | 51.1±6.3§     | 85.0±8.1           | §P<0.01 vs. Cx &<br>P<0.05 vs. SSRI-LBW |

Data are means±sem. P-values for comparisons reflect the results for the *post hoc* analysis which has been carried out only when the one way of analysis of variance test (ANOVA) results in a p-value less than 0.05.

**Table 3. Muscle Glucose Metabolism.**

|                                                                                                    | Cx<br>(N=5-14) | LBW<br>(N=8-9) | SSRI-LBW<br>(N=6-8) | Post hoc test P-values               |
|----------------------------------------------------------------------------------------------------|----------------|----------------|---------------------|--------------------------------------|
| <i>Glycogen &amp; GLUT4-Protein Content in Red (RG) and White (WG) Gastrocnemius Muscle Tissue</i> |                |                |                     |                                      |
| Basal Glycogen WG<br>(µmol/g muscle w.w.)                                                          | 38.8±1.3       | 40.5±1.7       | 42.9±1.8            | ---                                  |
| Basal Glycogen RG<br>(µmol/g muscle w.w.)                                                          | 31.4±2.2*      | 33.8±1.7*      | 32.4±2.3*           | †P<0.05 vs. WG                       |
| Total GLUT4 Content WG<br>(arbitrary units)                                                        | 9.89±3.36      | 10.32±0.90     | 9.97±0.58           | ---                                  |
| Total GLUT4 Content RG<br>(arbitrary units)                                                        | 13.93±0.71*    | 16.38±1.92*    | 13.22±0.98*         | †P<0.05 vs. WG                       |
| <i>PkB Ser (473) Phosphorylation in Red Gastrocnemius Muscle Tissue</i>                            |                |                |                     |                                      |
| Basal Phosphorylation<br>(arbitrary units)                                                         | 29,568±3,239   | 31,691±4,901   | 22,459±4,429        | ---                                  |
| Clamp Phosphorylation<br>(arbitrary units)                                                         | 69,596±10,600† | 56,729±7,641†  | 76,127±8,287†‡      | †P<0.05 vs. Basal<br>‡P<0.10 vs. LBW |
| Insulin-Stimulated<br>Increase from Basal (%)                                                      | 135±4          | 79±24          | 239±43§             | §P<0.05 vs. LBW                      |

Data are means±sem. P-values for comparisons reflect the results for the *post hoc* analysis which has been carried out only when the one way of analysis of variance test (ANOVA) results in a p-value less than 0.05.

**For online publication.**

| <b>Primer sequences for PCR experiments (Buhl ES et al, 2009)</b> |                               |
|-------------------------------------------------------------------|-------------------------------|
| <b>mRNA Expression Studies in Liver Tissue</b>                    |                               |
| G6Pase forward primer                                             | AGG GTA AAA GAA AAG AGC GTT G |
| G6Pase reverse primer                                             | GTA GAC ATG GCT TGC ATA TGG T |
| PEPCK forward primer                                              | CAG GAA GTG AGG AAG TTT GTG G |
| PEPCK reverse primer                                              | ATG ACA CCC TCC TCC TGC AT    |
| GAPDH forward primer                                              | TCACCACCATGGAGAAGGC           |
| GAPDH reverse primer                                              | GCTAAGCAGTTGGTGGTGCA          |
| <b>mRNA Expression Studies in Brain Tissue</b>                    |                               |
| GR forward primer                                                 | GGTACTCAAGCCCTGGAATG          |
| GR reverse primer                                                 | CAATCGTTTCTTCCAGCACA          |
| MR forward primer                                                 | TGAGTTCCTTCCCACCTGTC          |
| MR reverse primer                                                 | AAGCCTCATCTCCACACACC          |
| HSD1 forward primer                                               | CTCTCTGTGTCCTCGGCTTC          |
| HSD1 reverse primer                                               | TTCCATGATCCTCCTTCCTG          |
| 18S forward primer                                                | ACGGACCAGAGCGAAAGCAT          |
| 18S reverse primer                                                | TGTCAATCCTGTCCGTGTCC          |
| Beta-Actin forward primer                                         | TGTCACCAACTGGGACGATA          |
| Beta-Actin reverse primer                                         | GGGGTGTGTAAGGTCTCAA           |
| Cyclophilin A forward primer                                      | AGCACTGGGGAGAAAGATT           |
| Cyclophilin A reverse primer                                      | AGCCACTCAGTCTTGGCAGT          |
| GAPDH forward primer                                              | TCACCACCATGGAGAAGGC           |
| GAPDH reverse primer                                              | GCTAAGCAGTTGGTGGTGCA          |
| Hmbs forward primer                                               | TCCTGGCTTTACCATTGGAG          |
| Hmbs reverse primer                                               | TGAATTCCAGGTGAGGGAAC          |
| Hprt1 forward primer                                              | GCAGACTTTGCTTTCCTTGG          |
| Hprt1 reverse primer                                              | CGAGAGGTCC TTTTACCAG          |
| Rpl13A forward primer                                             | ACAAGAAAAAGCGGATGGTG          |
| Rpl13A reverse primer                                             | TTCCGGTAATGGATCTTTC           |
| Ywhaz forward primer                                              | TTGAGCAGAAGACGGAAGGT          |
| Ywhaz reverse primer                                              | GAAGCATTGGGGATCAAGAA          |

G6Pase: glucose-6-phosphatase; PEPCK: Phosphor-enol-pyruvate-carboxy-kinase; GAPDH: Glyceraldehyde-3-phosphate dehydrogenase; GR: Glucocorticoid-receptor; MR: Mineralo-corticoid-receptor; 18S: 18s subunit ribosomal RNA; HSD1: 11 $\beta$  hydroxysteroid dehydrogenase 1; Hmbs : Hydroxy-methylbilane synthase; Hprt1: Hypoxanthine guanine phosphoribosyl transferase 1; Rpl13A: Ribosomal protein L13A; Ywhaz :Tyrosine 3-monooxygenase/tryptophan 5-monooxygenase activation protein, zeta;
